# Supplementary material for: Preparation of ZnS@N-doped-carbon compositesviaa ZnS-amine precursor vacuum pyrolysis route
Source: Royal Society of Chemistry journal article supplement (doi:10.1039/d1ra06427d), 2021-01-01
Supplement: d1ra06427d1.pdf [file d1ra06427d1.pdf]

## Preparation of ZnS@N-doped-carbon composites *via* a ZnS-amine precursor vacuum pyrolysis route

Wen-Hua Liao,<sup>a, b</sup> Qian-Qian Hu,<sup>b</sup> Min Cheng,<sup>a, b</sup> Xiao-Hui Wu,<sup>a</sup> Guang-Hao Zhan,<sup>b, d</sup> Rui-Bo Yan,<sup>a, b</sup>

Jian-Rong Li,<sup>c\*</sup> Xiao-Ying Huang<sup>b\*</sup>

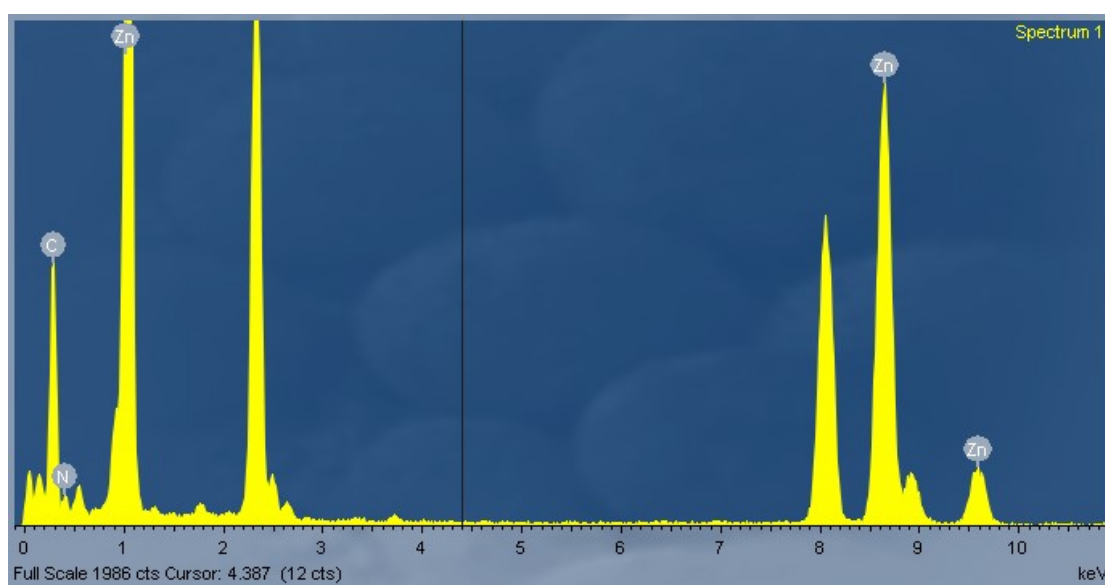

Fig.S1. EDS spectrum of ZnS@NC-H

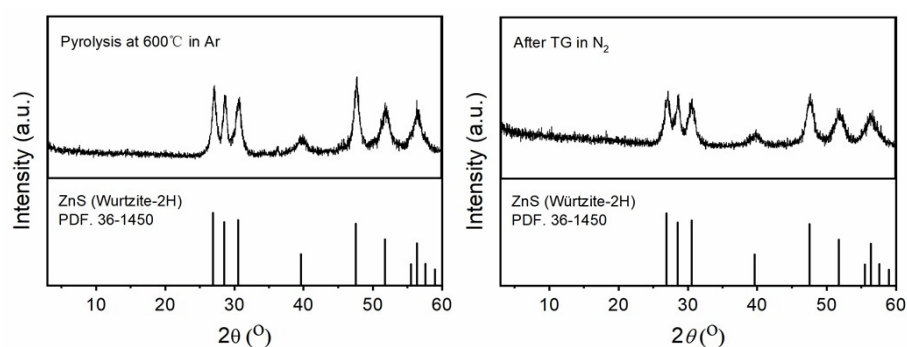

Fig. S2. XRD of Exp-ZnS(*ba*) pyrolysis at 600 °C in Ar atmosphere (left) and in N<sub>2</sub> atmosphere during TG test (right).

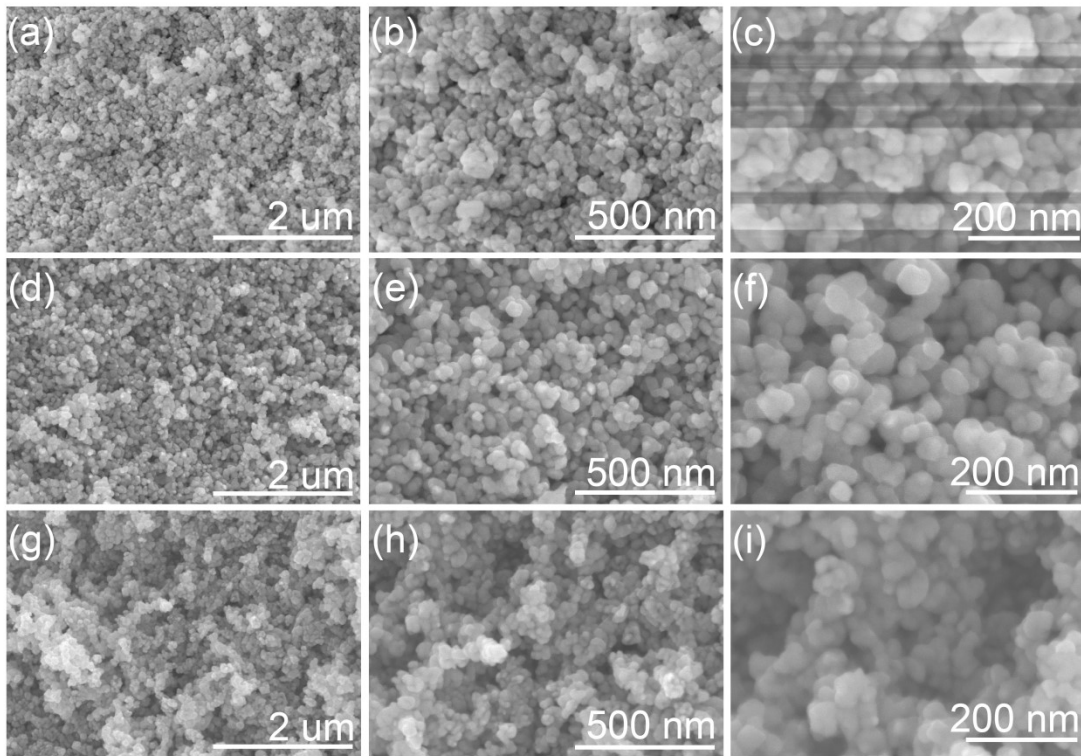

Fig. S3. SEM image of (a-c) ZnS@NC-L, (d-f) ZnS@NC-M, (g-h)ZnS@NC-H.

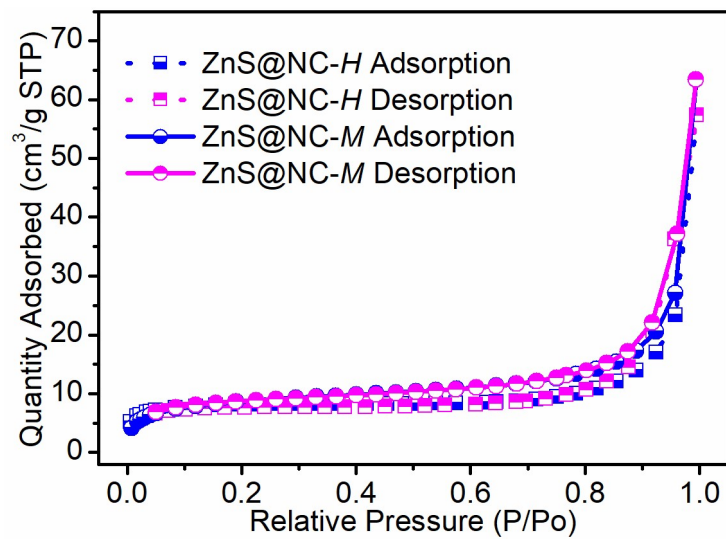

Fig. S4. N<sub>2</sub> adsorption-desorption isotherm of ZnS@NC-M and ZnS@NC-H.

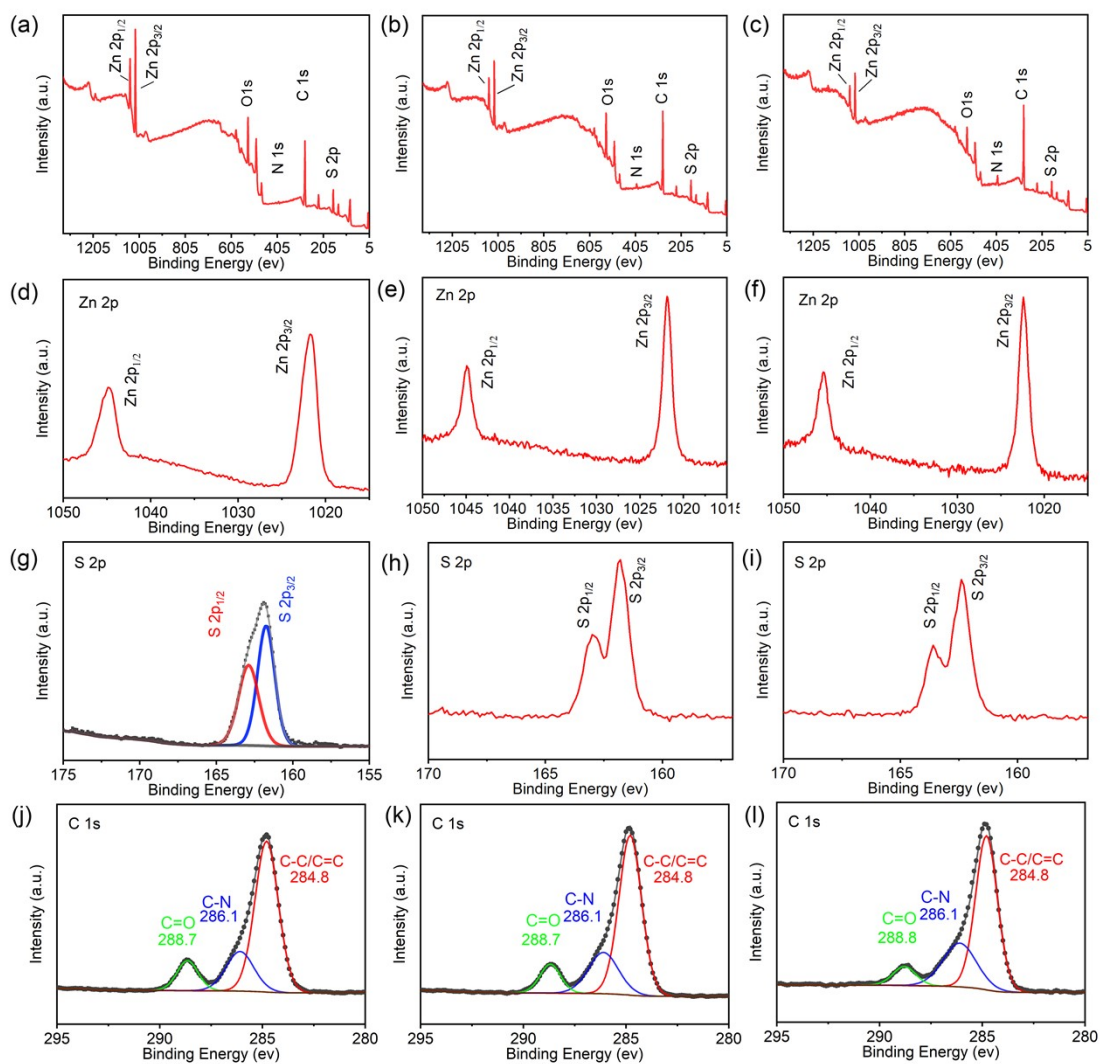

Fig. S5. XPS spectra of ZnS@NC-L (a, d, g, j), ZnS@NC-M (b, e, h, k) and ZnS@NC-H (c, f, i, l).

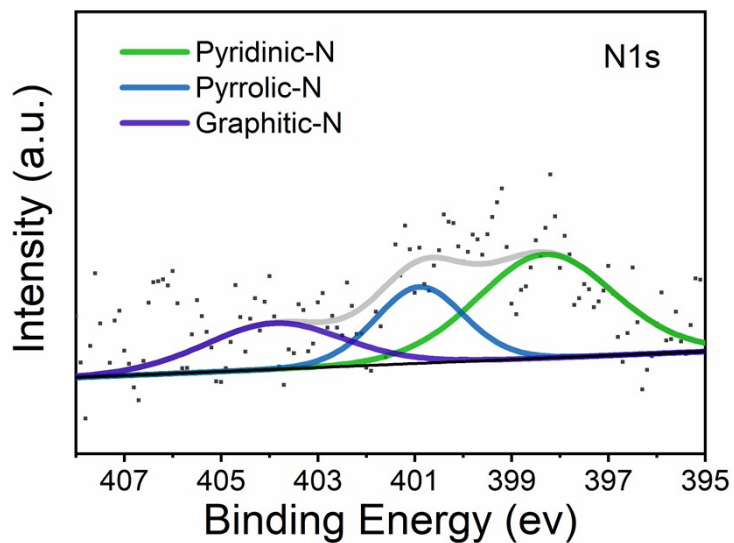

Fig. S6. XPS spectra of three types of nitrogen atoms of ZnS@NC-L

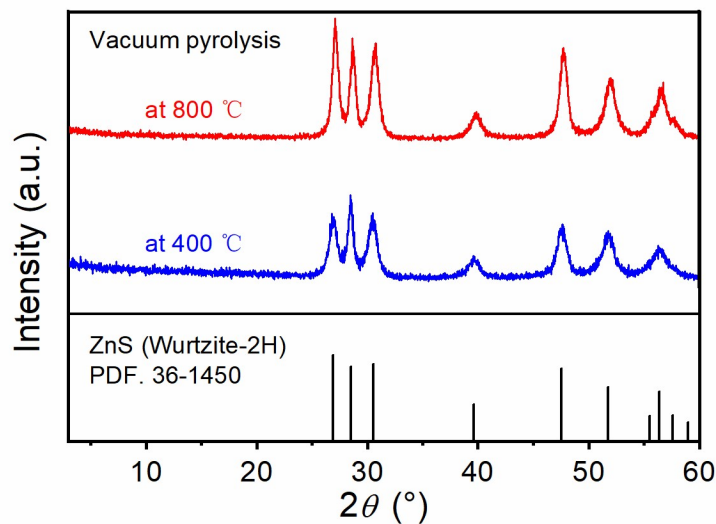

Fig. S7. XRD of Exp-ZnS(*ba*) vacuum pyrolysis at 400 and 800 °C.

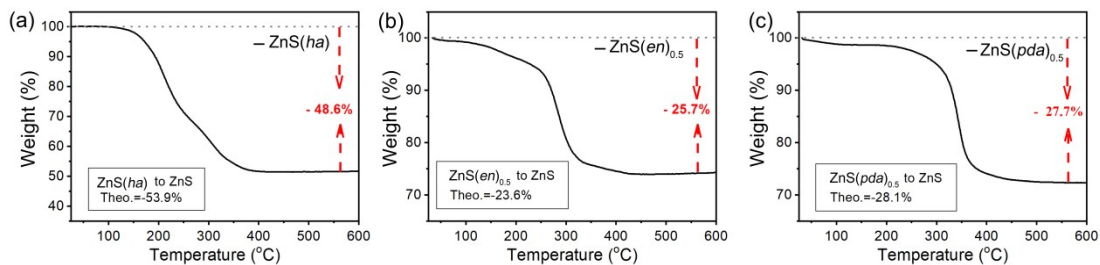

Fig. S8. TGA curves of preparation procedures of (a) Exp-ZnS(*ha*), (b) Exp-ZnS(*en*)<sub>0.5</sub> and (c) Exp-ZnS(*pda*)<sub>0.5</sub> by reflux method.

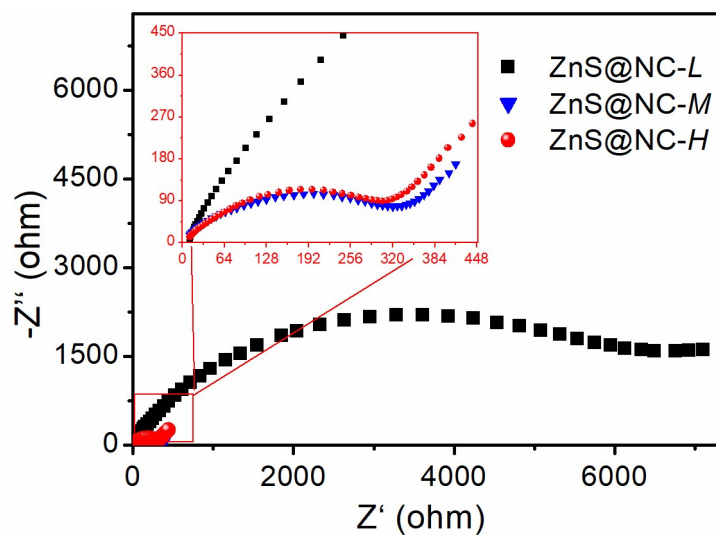

Fig. S9. The EIS plots of ZnS@NC-L, ZnS@NC-M and ZnS@NC-H.

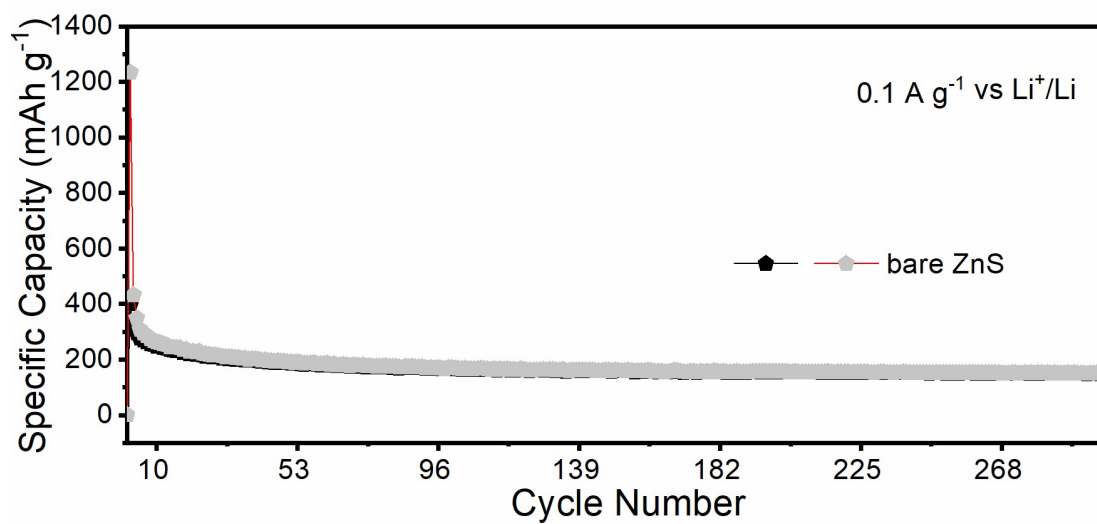

Fig. S10. Long cycling performances of bare ZnS at a current density of  $0.1 \text{ A g}^{-1}$ .

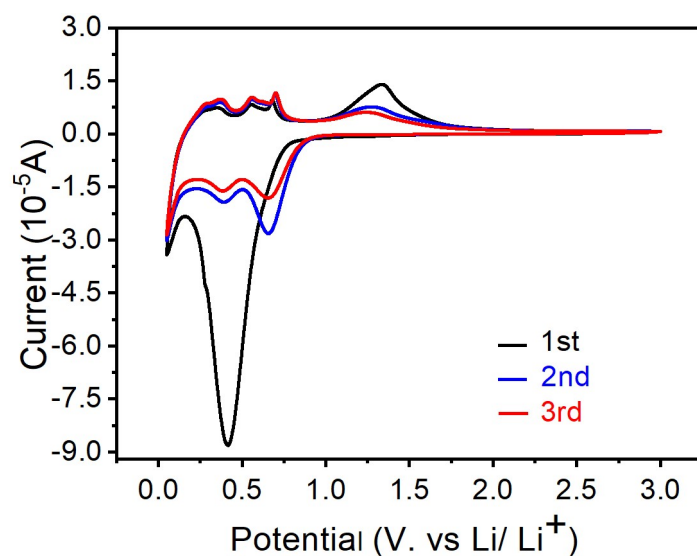

Fig. S11. Initial three cycle CV curves of bare ZnS at a scan rate of  $0.2 \text{ mV s}^{-1}$  between 0.05 and 3.0 V vs Li/Li<sup>+</sup>.

Table S1. Elemental analysis results of different materials.

| Sample                                                   | C wt% | N wt% | H wt% |
|----------------------------------------------------------|-------|-------|-------|
| ZnS( <i>ba</i> ) prepared by the reflux method           | 26.17 | 7.70  | 5.88  |
| ZnS( <i>ba</i> ) pyrolysis at 600 °C of Ar atmosphere    | 0.31  | <0.3  | <0.3  |
| ZnS( <i>ba</i> ) pyrolysis at 400 °C by vacuum pyrolysis | 3.69  | 0.56  | 0.39  |
| ZnS( <i>ba</i> ) pyrolysis at 800 °C by vacuum pyrolysis | 12.32 | 2.10  | <0.3  |

**Preparation of ZnS(*ba*) pyrolysis at 400 °C and 800 °C by vacuum pyrolysis:**

The obtained ZnS(*ba*) is encapsulated in a quartz glass tube after being evacuated. Then, the ZnS@NC materials are obtained by pyrolysis of ZnS(*ba*) at 400 and 800 °C

for 2 h with the heating rate of 2 °C min<sup>-1</sup>, respectively.

Table S2. Different synthesis strategy of ZnS/NC materials.

| Materials                                                         | Method                                                             | Additional carbon source                                                                  | Additional nitrogen source                                     | Ref.            |
|-------------------------------------------------------------------|--------------------------------------------------------------------|-------------------------------------------------------------------------------------------|----------------------------------------------------------------|-----------------|
| ZnS@NC                                                            | ZnS-amine,<br>Vacuum pyrolysis                                     | --                                                                                        | --                                                             | This literature |
| ZnS@C nanoparticles anchored on 3D N-doped carbon foam            | Annealing in N <sub>2</sub>                                        | MA sponge                                                                                 | MA sponge                                                      | 1               |
| ZnS@N.f-MWCNTs@rGO                                                | Hydrothermal method                                                | Pre-prepared N-doped functionalized multiwall carbon nanotubes and reduced graphene oxide | Pre-prepared N-doped functionalized multiwall carbon nanotubes | 2               |
| Mesoporous ZnS@N-doped carbon composites                          | In-situ sulfuration,<br>Carbonization in N <sub>2</sub>            | Methionine                                                                                | Methionine                                                     | 3               |
| N-doped carbon coating mesoporous ZnS nanospheres                 | Dopamine polymerization,<br>Thermal treatment in Ar                | Polydopamine                                                                              | Polydopamine                                                   | 4               |
| ZnO/ZnS@N-C                                                       | Nitrogen-rich MOF,<br>Annealing in Ar                              | CNT                                                                                       | --                                                             | 5               |
| ZnS quantum dots@multilayered N-doped carbon matrix               | Nitrogen-rich MOF,<br>Vacuum pyrolysis,<br>Sulfuration             | --                                                                                        | --                                                             | 6               |
| ZnS/N-doped carbonaceous fibers                                   | Pyrolyzed in N <sub>2</sub>                                        | Aspergillus niger                                                                         | Aspergillus niger                                              | 7               |
| ZnS nanoparticles wrapped in N-doped mesoporous carbon nanosheets | Nitrogen-rich MOF,<br>Annealing in N <sub>2</sub> ,<br>Sulfuration | --                                                                                        | --                                                             | 8               |
| ZnS-N/C nanocomposites                                            | Nitrogen-rich MOF,<br>Annealing in N <sub>2</sub>                  | --                                                                                        | --                                                             | 9               |

## Referene

1. X. Ma, X. Xiong, P. Zou, W. Liu, F. Wang, L. Liang, Y. Liu, C. Yuan and Z. Lin, General and scalable fabrication of core-shell metal sulfides@C anchored on 3D N-doped foam toward flexible sodium ion batteries, *Small*, 2019, **15**, 1903259.
2. M. W. Khan, X. Zuo, Q. Yang, H. Tang, K. M. U. Rehman, M. Wu and G. Li, Quantum dot embedded N-doped functionalized multiwall carbon nanotubes boost the short-circuit current of Ru(ii) based dye-sensitized solar cells, *Nanoscale*, 2020, **12**, 1046-1060.
3. J. Zhu, Z. Chen, L. Jia, Y. Lu, X. Wei, X. Wang, W. D. Wu, N. Han, Y. Li and Z. Wu, Solvent-free nanocasting toward universal synthesis of ordered mesoporous transition metal sulfide@N-doped carbon composites for electrochemical applications, *Nano Res.*, 2019, **12**, 2250-2258.
4. W. Ji, L. Hu, X. Hu, Y. Ding and Z. Wen, Nitrogen-doped carbon coating mesoporous ZnS nanospheres as high-performance anode material of sodium-ion batteries, *Mater. Today Commun.*, 2019, **19**, 396-401.
5. C. Guo, Q. Wang, J. He, C. Wu, K. Xie, Y. Liu, W. Zhang, H. Cheng, H. Hu and C. Wang, Rational



- design of unique ZnO/ZnS@N-C heterostructures for high performance lithium-ion batteries, *J. Phys. Chem. Lett.*, 2020, **11**, 905-912.
6. D. Fang, S. Chen, X. Wang, Y. Bando, D. Golberg and S. Zhang, ZnS quantum dots@multilayered carbon: geological-plate-movement-inspired design for high-energy Li-ion batteries, *J. Mater. Chem. A*, 2018, **6**, 8358-8365.
  7. J. Li, L. Wang, L. Li, C. Lv, I. V. Zatovsky and W. Han, Metal sulfides@carbon microfiber networks for boosting lithium ion/sodium ion storage via a general metal-aspergillus niger bioleaching strategy, *ACS Appl. Mater. Interfaces*, 2019, **11**, 8072-8080.
  8. Z. B. Zhai, K. J. Huang, X. Wu, H. Hu, Y. Xu and R. M. Chai, Metal-organic framework derived small sized metal sulfide nanoparticles anchored on N-doped carbon plates for high-capacity energy storage, *Dalton Trans.*, 2019, **48**, 4712-4718.
  9. X. Lin, B. Liu, H. Huang, C. Shi, Y. Liu and Z. Kang, One-step synthesis of ZnS-N/C nanocomposites derived from Zn-based chiral metal-organic frameworks with highly efficient photocatalytic activity for the selective oxidation of cis-cyclooctene, *Inorg. Chem. Front.*, 2018, **5**, 723-731.
